1 Regulation of eIF2 $\alpha$  Phosphorylation by MAPKs Influences Polysome Stability and  
2 Protein Translation

3

4 Sana Parveen<sup>1,#</sup>, Haripriya Parthasarathy<sup>1,#</sup>, Dhiviya Vedagiri<sup>1,2</sup>, Divya Gupta<sup>1</sup>, Hitha

5 Gopalan Nair<sup>1</sup>, and Krishnan Harinivas Harshan<sup>1,2\*</sup>

6

7 Affiliations: <sup>1</sup>CSIR-Centre for Cellular and Molecular Biology, Hyderabad-500007,

8 India

9 <sup>2</sup>Academy of Scientific and Innovative Research (AcSIR), Ghaziabad-201002, India

10

11 #Equal Contributors

12 \*Correspondence: [hkrishnan@ccmb.res.in](mailto:hkrishnan@ccmb.res.in)

13

14 Running title – MAPKs are central to protein translation regulation

15

16

17

18 Key words: Translation, p38 MAPK, ERK1/2, eIF2 $\alpha$ , Mnk1/2, Polysome, Integrated

19 stress response

20

21

22

23

24

25

26

## 27 **ABSTRACT**

28 Regulation of protein translation occurs primarily at the level of initiation and is  
29 mediated by multiple signaling pathways, majorly mechanistic target of rapamycin  
30 complex 1 (mTORC1), mitogen-activated protein kinases (MAPKs), and the  
31 eukaryotic translation initiation factor eIF2. While mTORC1 and eIF2 $\alpha$  influence the  
32 polysome stability, MAPKs influence the phosphorylation of the cap-binding protein  
33 eIF4E and are known to influence translation of only a small set of mRNAs. Here, we  
34 demonstrate that p38 MAPK and ERK1/2 regulate translation through integrated  
35 stress response (ISR) pathways. Dual inhibition (dual-Mi) of p38 MAPK and ERK1/2  
36 caused substantial phosphorylation of eIF2 $\alpha$  in a synergistic manner, resulting in  
37 near-absolute collapse of polysomes. This regulation was independent of Mnk1/2, a  
38 well-studied mediator of translation regulation by the MAPKs. Dual-Mi-induced  
39 polysome dissociation was far more striking than that caused by sodium arsenite, a  
40 strong inducer of ISR. Interestingly, induction of ISR caused increased p38  
41 phosphorylation, and its inhibition resulted in stronger polysome dissociation,  
42 indicating the importance of p38 in the translation activities. Thus, our studies  
43 demonstrate a major, unidentified role for ERK1/2 and more particularly p38 MAPK  
44 in the maintenance of homeostasis of polysome association and translation  
45 activities.

## 46 **INTRODUCTION**

47 Protein translation is a major regulatory event in gene expression in eukaryotes.  
48 Initiation is often the target for translation regulation and is achieved either by  
49 limiting the cap complex assembly or through preventing the recycling of pre-  
50 initiation complex (PIC) (1). Regulation is achieved through three major signal  
51 pathways, viz. mechanistic target of rapamycin complex 1 (mTORC1), initiation

52 factor eIF2 and MAPK-eIF4E pathways. While alterations in the activities of  
53 mTORC1 and eIF2 directly impact polysome assembly, those in the eukaryotic  
54 translation initiation factor (eIF4E) do not appear to be globally consequential. eIF4E,  
55 the cap binding protein associates with eIF4G and eIF4A to form eIF4F complex  
56 whose formation is influenced by eIF4E availability (2). eIF4E is phosphorylated at  
57 S209 by MAPK interacting kinases Mnk1 and Mnk2 (3,4) that are regulated by two  
58 mitogen activated protein kinases (MAPKs), viz. extracellular signal regulated  
59 kinases (ERK1/2) and p38 MAPK (hereafter referred to as p38) (5,6). Even as the  
60 role of phosphorylation on the affinity of eIF4E for the cap is contradicted (7),  
61 phosphorylated eIF4E has transforming and oncogenic potentials (8-10). eIF4E  
62 overexpression is reported in large cases of cancers (11). It is proposed that eIF4F  
63 complex with phosphorylated eIF4E can translate certain transcripts that are  
64 excluded by the complex with unphosphorylated eIF4E (9,12,13). eIF4E  
65 phosphorylation was also well demonstrated to influence the translation of  
66 specialised mRNAs including those of I $\kappa$ B $\alpha$  that mediates type I IFN production (14).

67 mTOR is a S/T kinase that assembles into one of the two distinct complexes  
68 (mTORC1/mTORC2) (15,16). mTORC1 is a key regulatory hub for various cellular  
69 and physiological activities such as translation and autophagy (17,18). mTORC1  
70 regulates protein translation through at least two major substrates, eIF4E binding  
71 protein (4EBP) and the ribosome S6 kinase, p70 S6K (19,20). mTORC1-mediated  
72 multi-site phosphorylation of 4EBP1 releases eIF4E from sequestration facilitating its  
73 availability for binding to 5' caps of mature mRNAs. In spite of its perceivable key  
74 role in translation, mTORC1 inhibition does not result in total inhibition of translation  
75 activities (21-23). Studies in the past have identified several mRNAs that respond to  
76 mTORC1 activity. mRNAs with a 5' terminal oligopyrimidine (5' TOP) element are

77 particularly vulnerable to translation inhibition caused by mTORC1 inhibitors such as  
78 rapamycin, Torin1 and pp242 (21,22,24,25).

79 eIF2, a heterotrimeric complex formed by the association of  $\alpha$ ,  $\beta$ , and  $\gamma$  subunits, is a  
80 critical component of the ternary complex with Met-tRNA<sup>Met</sup> and GTP (eIF2-TC).

81 eIF2-TC binds to the 40S ribosome to form 43S PIC (26,27). Of these, eIF2 $\alpha$  is the  
82 regulatory subunit that upon phosphorylation at S52 leads to the inhibition of GDP  
83 exchange with GTP after the hydrolysis of the bound GTP. eIF2 $\alpha$  is phosphorylated  
84 by integrated stress response (ISR) kinases HRI, GCN2, PKR, and PERK (26-28).  
85 Of the known pathways, eIF2 $\alpha$  phosphorylation has the most significant impact on  
86 translation as this leads to the most severe translation inhibition (28).

87 Despite having their distinct spheres of regulation, there has not been any major  
88 understanding on how these pathways influence each other under specific stimuli  
89 barring a few reports (29). Certain degree of cross-activation of mTORC1 by ERK  
90 through p90 ribosomal S6 kinase- mediated phosphorylation of RAPTOR is reported  
91 (30). Partial dephosphorylation of eIF4E upon mTORC1 inhibition is also reported  
92 (31). Studies also cite certain amount of cross-talk between mTORC1 and eIF2 $\alpha$   
93 during autophagy (32). Interestingly, none of these pathways appear to wield a  
94 dominant role over the other. A recent study in fact reported that about 90% of the  
95 proteins affected by ISR induced by distinct signals are common barring a small  
96 subset of unique proteins (29). This also suggests the existence of alternate  
97 pathways to ensure basal translation activities under most of the conditions. Here,  
98 we report that co-inhibition of p38 MAPK and ERK1/2 resulted in dose-dependent  
99 phosphorylation of eIF2 $\alpha$  indicative of ISR, strong dissociation of polysomes, and  
100 inhibition of translation. Both cap-dependent and cap-independent pathways were  
101 suppressed under these conditions. eIF2 $\alpha$  phosphorylation by sodium arsenite

102 induced p38 MAPK, which was critical in maintaining basal translation activities.  
103 Mnk1/2 inhibition failed to bring about similar effects indicating the involvement of  
104 alternate pathways downstream of the MAPKs leading up to eIF2 $\alpha$  phosphorylation.  
105 Interestingly, Mnk1/2 inhibition activated Akt that could possibly have contributed to  
106 the stabilization of translation activities under this condition. Our studies demonstrate  
107 a dominant role for p38 and ERK1/2 in the regulation of protein translation, through  
108 eIF2 $\alpha$  phosphorylation.

## 109 **Experimental procedures**

### 110 **Cell culture, inhibitors, and antibodies**

111 All the cell lines were cultured in DMEM supplemented with 10% Fetal Bovine  
112 Serum, penicillin-streptomycin and NEAA. Sodium arsenite, U0126, p38 MAPK  
113 inhibitor VIII, Akt-1/2 inhibitor VIII, and ETP-45835 were procured from Merck  
114 Millipore and Torin1 was purchased from Tocris Bioscience. All the primary  
115 antibodies except  $\beta$ -Tubulin and GAPDH (Thermo Fisher Scientific) were purchased  
116 from Cell Signaling Technology. HRP-conjugated secondary antibodies were from  
117 Jackson ImmunoResearch.

### 118 **Inhibitor treatments and immunoblotting**

119 Cells were grown to 70-80% confluency, harvested, and lysed in NP-40 lysis buffer  
120 (33). Inhibitions were performed in most cases for 1- hour unless otherwise  
121 mentioned. Actively growing cells were treated with either vehicle or inhibitor-  
122 containing media before lysis. All the inhibitors were diluted in fresh DMEM right  
123 before the experiments. Protein concentration was estimated by BCA method (G  
124 Biosciences). Equal quantities of protein lysates were separated by SDS-PAGE,

125 transferred to an activated PVDF membrane, and immunoblotting was performed as  
126 mentioned elsewhere (33).  $\beta$ -Tubulin and GAPDH were used as loading controls.

### 127 **Polysome preparation and profiling**

128 Reagents for polysome analysis were purchased from Sigma and MP chemicals.

129 Polysome profiles of the inhibited cells were analyzed as described earlier (33). Cells  
130 were grown in 150 cm<sup>2</sup> flasks till 70% confluency and inhibition studies were  
131 performed for 1- hour. Following the inhibition, the cells were harvested and washed  
132 twice with ice-cold 1 $\times$ PBS containing 100  $\mu$ g/mL cycloheximide. The lysates were  
133 prepared in polysome lysis buffer (20 mM Tris-Cl pH 8.0, 140 mM KCl, 1.5 mM  
134 MgCl<sub>2</sub>, 0.5 mM DTT, 1% Triton X-100, 1 $\times$  protease inhibitor, 0.5 mg/mL heparin, 100  
135  $\mu$ g/mL cycloheximide, 100 units of RNasin/mL) and crude RNA concentrations were  
136 spectrophotometrically measured. 175  $\mu$ g of crude RNA lysates were layered on 11  
137 mL of 10-50% linear sucrose gradients (20 mM Tris-Cl pH 8.0, 140 mM KCl, 1.5 mM  
138 MgCl<sub>2</sub>, 0.5 mM DTT, 100  $\mu$ g/mL cycloheximide, 10mM PMSF, and 10-50% sucrose)  
139 and the resulting gradients were centrifuged in SW-41 Ti rotor (Beckman Coulter) at  
140 35,000 r.p.m. at 4°C for 3- hours. The samples were fractionated using Teledyne  
141 ISCO fraction collector system with a constant monitoring of absorbance at 254 nm  
142 to generate Polysome profiles.

### 143 **Luciferase assay**

144 Cells were seeded in 6 well plate format and grown till 70% confluency and the  
145 luciferase reporter plasmids were transfected using Lipofectamine 3000 (Thermo  
146 Fisher Scientific). One hour prior to harvesting, the transfected cells were treated  
147 with the specific inhibitors. Cells were harvested 10- hours post-transfection and the

148 luciferase reads were quantified using Dual-Luciferase reagents (Promega) as per  
149 manufacturer's protocol on EnSpire multimode plate reader (Perkin Elmer).

### 150 **OPP Assay**

151 Total protein synthesis was quantified with the help of OPP-incorporation assay  
152 based on Click-iT™ chemistry using the Click-iT™ Plus OPP-Alexa Fluor™ 488  
153 protein synthesis assay kit (Life Technologies). The assay was carried out in  
154 accordance with the manufacturer's recommendations. Briefly, Huh7.5 cells were  
155 seeded in 8-well chamber slides (Lab-Tek) up to ~80% confluency, and  
156 subsequently treated with either DMSO, p38 MAPK inhibitor VIII, U0126 or both for  
157 1- hour. Post-treatment, the cells were treated with 20 μM OPP for 30 minutes at  
158 37°C, followed by fixing with 3.7% formaldehyde and permeabilization with 0.5%  
159 Triton X-100 in PBS. Click-iT reaction was carried out with Alexa Fluor 488-picolyl  
160 azide for 30 minutes followed by nuclear staining using NuclearMask™ Blue stain.  
161 Stained cells were imaged using AxioImager Z2 microscope using Alexa Fluor-488  
162 and DAPI filters for detection. Threshold level was set using OPP-untreated cells.  
163 Images were captured at 20x magnification. Image analysis was done using FIJI.  
164 Mean whole-cell fluorescence of ~90 individual cells per sample from each set was  
165 measured after background subtraction from individual fields. Data is represented as  
166 mean fluorescence intensity.

### 167 **Cell viability assays**

168 Cell viability assays for treatments were carried out using MTT or trypan blue  
169 exclusion assay. For all assays, cells were seeded till ~80% confluency and treated  
170 with the pharmaceutical compound as mentioned. Vehicle- or inhibitor-treated cells  
171 were trypsinized and mixed in 1:1 ratio with 0.4% trypan blue and counted using

172 Neubauer chamber to determine the cell count. For MTT assay, media containing  
173 MTT (final concentration of 0.5 mg/mL) was added to cells post treatment and  
174 incubated at 37°C for 3.5- hours. Formazan crystals formed were dissolved in 500  $\mu$ L  
175 DMSO with mild agitation for 30 minutes. The assay readout was measured as  
176 absorbance at 440 nm, with a reference reading at 650 nm.

## 177 **Statistical Analysis**

178 Data from three independent experiments were used for statistical analysis using  
179 two-tailed Student's *t*-test for viability and dual-luciferase assays and represented  
180 graphically as Mean  $\pm$  SEM. One-way ANOVA was used for OPP assay analysis and  
181 plotted as median with interquartile range. \*, \*\* and \*\*\* indicate *p*-values < 0.05,  
182 0.005 and 0.0005, respectively.

## 183 **RESULTS**

### 184 **p38 MAPK and ERK1/2 dual inhibition inhibit eIF4E phosphorylation in a dose-** 185 **dependent manner**

186 p38 and ERK1/2, two major MAPKs regulate the phosphorylation of eIF4E through  
187 phosphorylating and activating Mnk1/2 (3,5,34,35). However, there is little  
188 mechanistic evidence on their synergistic regulation of eIF4E and subsequent impact  
189 on translation. We addressed this question by comparing eIF4E phosphorylation  
190 status under conditions of individual and simultaneous inhibitions of both MAPKs.  
191 First, we compared the degree of inhibition in Huh7.5 cells upon three combinations  
192 of p38 MAPK inhibitor VIII (p38i) and U0126 (ERK1/2i), viz. 12.5/25  $\mu$ M, 25/50  $\mu$ M  
193 and 50/100  $\mu$ M concentrations. The status of eIF4E phosphorylation after 1- hour  
194 inhibition was analyzed as the measure of inhibition. A gradual and dose-dependent  
195 dephosphorylation of Mnk1 and eIF4E was observed and total dephosphorylation



196 was achieved at the combination of 50/100  $\mu$ M concentrations (Figure 1A). However,  
197 cell viability was only modestly impacted by the treatments (Figure 1B). Total  
198 dephosphorylation of eIF4E was also achieved in MCF7 cells (Figure 1C). Next, we  
199 studied if the dual MAPK inhibition (dual-Mi) had any synergistic effect on eIF4E  
200 phosphorylation. Torin1, a potent mTOR inhibitor has been shown previously to  
201 affect translation. Torin1 treatment (750 nM) for 1- hour was done alongside MAPK  
202 inhibitions, to compare the effects of each treatment on MAPK substrate  
203 phosphorylation. Inhibition of mTORC1 was confirmed by the dephosphorylation of  
204 its substrates 4EBP1 and ULK1 (Figure 4A). As demonstrated in Figure 1D, the dual  
205 inhibition in Huh7.5 cells resulted in much stronger inhibition of Mnk1 and eIF4E than  
206 the individual inhibitions did, suggesting that p38 and ERK1/2 synergistically regulate  
207 eIF4E phosphorylation. No significant change was observed in the sample inhibited  
208 with Torin1, confirming the specificity of the treatments. Similar results were  
209 observed in MCF7 and HeLa cells (Figure S1 A & B, respectively)

210 **Dual-Mi at high concentrations causes near-absolute collapse of polysomes**  
211 **and severe suppression of global translation**

212 In order to characterize the effect of dual-Mi on global translation, polysome profiles  
213 in Huh7.5 cells treated with individual inhibitors or both (at 50/100  $\mu$ M for p38 MAPK  
214 inhibitor VIII/U0126 respectively) were mapped. It may be noted that these  
215 concentrations were consciously chosen in this study so that the translation activities  
216 could be studied under conditions of complete inhibition of the MAPKs. Surprisingly,  
217 1- hour dual-Mi in Huh7.5 cells caused near-absolute collapse of polysome peaks  
218 with corresponding accumulation of 80S, suggesting a global inhibition of translation  
219 activities (Figure 2A). No polysome peaks were visible under this condition,  
220 reminiscent of translation arrest caused by puromycin treatment (36). In comparison

221 to dual-Mi, individual inhibitions brought about only modest effects on the polysome  
222 peaks (Figure 2B). The magnitude of polysome dissociation by dual-Mi was  
223 remarkably higher than those caused by eIF2 $\alpha$  phosphorylation by various methods  
224 ((26,28) and Figure 6B) and mTORC1 inhibition by Torin1 (Figure 2C). Severe  
225 impact of dual-Mi on polysome association was observed in MCF7 cells as well  
226 (Figure S2A). Moderate collapse of polysomes was visible at a lower concentration  
227 of 25/50  $\mu$ M (Figure S2B), once again underlining the specificity of the response to  
228 the inhibitions. The results demonstrated that the concurrent loss of activity of the  
229 two MAPKs severely inhibits polysome assembly and possibly translation.

230 We next quantified the translation activities during dual-Mi in Huh7.5 cells by  
231 labelling the nascent polypeptides using O-propargyl-puromycin (OPP) incorporation  
232 assay. Cells were treated with p38 or ERK1/2 inhibitor or both of them for 1- hour  
233 and were labeled with OPP for 30 minutes. Subsequently, they were analyzed by  
234 fluorescence microscopy to quantify protein synthesis. As demonstrated in Figure  
235 2D, appreciable fluorescence was detected throughout cytoplasm accompanied by  
236 several bright foci in control cells indicating active translation. Both p38 and ERK1/2  
237 inhibitions decreased the incorporation of OPP, evident from both lower intensity  
238 fluorescence and reduced number of bright foci, implying lower translation rates. The  
239 strongest inhibition of OPP incorporation was detected in dual-Mi treated cells  
240 indicating very low levels of translation in them. Quantitative analysis of fluorescence  
241 intensities revealed approximate intensity drop of 50% in samples treated with either  
242 of the inhibitors and about 75% drop in dual-Mi samples, confirming strong inhibition  
243 of translation activities in these cells (Figure 2E), substantiating the polysome  
244 dissociation. These results also demonstrate that p38 and ERK1/2 are crucial  
245 guardians of eukaryotic translation.

246 **Mnk1/2 inhibition and eIF4E dephosphorylation do not recapitulate the**  
247 **polysome collapse caused by dual-Mi**

248 Though Mnk1/2 double KO mice did not display any translation and growth defect,  
249 studies have demonstrated Mnk1/2 as key molecules in the phosphorylation of  
250 eIF4E (12). We studied if the effects on translation during dual-Mi are channelled  
251 through Mnk1/2. Mnk1/2 inhibitor ETP-45835 brought about eIF4E  
252 dephosphorylation in a dose-dependent manner (Figure 3A). In agreement with  
253 previous reports, polysome profiles of Mnk1/2 inhibited cells did not demonstrate any  
254 appreciable level of polysome dissociation (Figure 3B) in contrast to dual-Mi  
255 treatment (Figure 2A). These results indicate the participation of other signal  
256 pathways regulating polysome assembly and translation during dual-Mi treatment.

257 **Dual-Mi causes moderate inhibition of mTORC1 activity**

258 Since eIF4E dephosphorylation caused no significant impact on the polysome  
259 assembly, we studied the involvement of the other known pathways in coordinating  
260 the polysome dissociation by dual-Mi. mTORC1 pathway is a well-known regulator of  
261 translation and its inhibition causes significant depletion of polysomes and loss in  
262 translation activities ((22) and Figure 2C). We analyzed whether dual-Mi causes  
263 mTORC1 inhibition. Huh7.5 cells displayed moderate inhibition of mTORC1 activity,  
264 evident from the dephosphorylation of 4EBP1 and ULK1, two important substrates of  
265 mTORC1 (Figure 4A). Dose-dependence of the inhibition demonstrated the  
266 specificity of this observation (Figure 4B). Individually, ERK1/2 inhibition induced a  
267 stronger mTORC1 inhibition than p38 inhibition (Figure 4A). Torin1, an mTOR  
268 inhibitor, caused severe inhibition of mTORC1 activity. The degree of mTORC1  
269 inactivation was less remarkable in MCF7 and HeLa cells (Figure S3 A & B,

270 respectively), indicating that this effect on mTORC1 activity is cell-specific and hence  
271 may not be contributing to the polysome dissociation by dual-Mi.

### 272 **Dual-Mi induces strong eIF2 $\alpha$ phosphorylation in a dose-dependent manner**

273 Next, we tested the effect of dual-Mi on eIF2 $\alpha$  phosphorylation. Huh7.5 cells  
274 subjected to dual-Mi were analyzed for the status of eIF2 $\alpha$  phosphorylation.  
275 Individually, p38 inhibition caused a moderate eIF2 $\alpha$  phosphorylation while ERK1/2  
276 inhibition caused a stronger phosphorylation (Figure 5A). Interestingly, dual-Mi  
277 brought about a much stronger phosphorylation than the individual inhibitions,  
278 indicating that the two MAPKs regulate eIF2 $\alpha$  independent of each other. These  
279 results also suggested that eIF2 $\alpha$  phosphorylation through ISR could be a critical  
280 event behind the polysome dissociation during dual-Mi. A dose-dependent  
281 phosphorylation of eIF2 $\alpha$  in response to varying concentrations of dual-Mi confirmed  
282 the specificity of the response (Figure 5B). eIF2 $\alpha$  phosphorylation was consistently  
283 observed in MCF7 and HeLa cells as well (Figure S4 A & B respectively). Our results  
284 demonstrate that p38 and ERK1/2 are important players in the regulation of eIF2 $\alpha$   
285 phosphorylation and in the translation activities. Mnk1/2 inhibition could not  
286 recapitulate eIF2 $\alpha$  phosphorylation (Figure 5C), ruling out its participation in the  
287 translation suppression associated with dual-Mi.

### 288 **Activation of p38 upon stress is pivotal for the maintenance of low-level** 289 **translation during eIF2 $\alpha$ phosphorylation**

290 The role of p38 as a key molecule facilitating stress response is well documented  
291 (37). We investigated the role of the two MAPKs in response to stress induced by  
292 general translation inhibitor sodium arsenite. Arsenite activates ISR kinases HRI,  
293 PKR, PERK and GCN that phosphorylate eIF2 $\alpha$  (38-41). Treatment of Huh7.5 cells

294 with 40  $\mu$ M arsenite induced strong eIF2 $\alpha$  phosphorylation as expected.  
295 Interestingly, p38, but not ERK1/2 was phosphorylated by the treatments (Figure  
296 6A), indicating its crucial role in the cell survival upon translation attenuation during  
297 ISR. Similar results were observed in MCF7 cells (Figure 6A). Intriguingly, stress-  
298 induced p38 phosphorylation did not cause Mnk1/2 and eIF4E phosphorylation  
299 (Figure 6A), indicating the involvement of other mechanisms in the regulation of  
300 eIF4E phosphorylation by p38 under conditions that promote it. Sodium arsenite did  
301 not affect mTORC1 substrates in both Huh7.5 and MCF7 cells, ruling out the  
302 possibility of mTORC1 participating in ISR (Figure S5 A & B, respectively). Polysome  
303 analysis of arsenite treated cells showed a drop in translation as expected (Figure  
304 6B). Despite a strong collapse of the heavy polysomes, lighter polysomes were  
305 intact. As indicated earlier, this polysome dissociation was less remarkable than that  
306 by dual-Mi, indicating the stronger translation inhibitory effects by the latter (Figures  
307 2A & 6B).

308 Translation arrest is a general response to ISR and our results suggest that p38  
309 activation is a probable feedback mechanism to sustain translation. In order to  
310 characterize the role of activated p38 upon ISR, we treated Huh7.5 cells with  
311 arsenite along with p38 inhibitor for 1- hour. This would, in principle, disallow the  
312 activation of p38 during ISR and hence could be an ideal set up to study the role of  
313 p38 in translation during ISR. Independently, p38 inhibition induced eIF2 $\alpha$   
314 phosphorylation similar in magnitude as arsenite did and their combined treatment  
315 did not further induce it (Figure 6C). Quite interestingly and as hypothesized,  
316 inhibition of p38 in cells treated with arsenite caused more severe polysome collapse  
317 as compared with arsenite treatment alone (Figure 6D). This result indicates that p38  
318 activation is a crucial and remedial consequence to ISR in the maintenance of

319 minimal translation activity required for the synthesis of necessary proteins. Our  
320 results demonstrate that activation of p38 is crucial in sustenance of translation upon  
321 ISR induction.

322 **Both cap-dependent and independent translations are inhibited by dual-Mi**

323 Even though the default mode of translation is 5'-cap-dependent, cap-independent  
324 translation is promoted under several physiological conditions of stress (42). Even  
325 under eIF2 $\alpha$  phosphorylation mediated translational arrest, a set of mRNAs are  
326 translated actively. To verify whether dual-Mi suppresses cap-independent  
327 translation, we used a bicistronic luciferase assay where translation of *Renilla*  
328 luciferase (Rluc) is cap-dependent whereas that of firefly luciferase (Fluc) is driven  
329 by HCV or EMCV IRES (Figure 7A) (43). Cells transfected with either of these  
330 vectors were subjected to dual-Mi and translation efficiencies were measured  
331 through luciferase activities. Interestingly, both Fluc and Rluc activities from HCV  
332 IRES construct were inhibited by approximately 60% after 1- hour of inhibition,  
333 indicating that dual-Mi mediated translation arrest inhibits both cap-dependent and  
334 cap-independent translation (Figure 7B). Inhibitions of similar magnitude from EMCV  
335 IRES construct confirmed the above observation (Figure 7C). A conventional  
336 analysis based on F/R ratio would not identify these inhibitions as both cap-  
337 dependent and independent translations were impacted similarly. These results are  
338 in agreement with the severe translation arrest described in previous section and  
339 indicate that concurrent inhibition of p38 and ERK1/2 affects translation machinery  
340 as a whole.

341

342

343

### 344 **eIF2 $\alpha$ phosphorylation is reversed during long-term dual-Mi**

345 The profound loss in polysome assembly and translation inhibition during dual-Mi for  
346 1- hour did not appear to affect the cellular viability. Long-term dual-Mi significantly  
347 inhibited cell viability as anticipated (Figure 8A), but, a considerable population of  
348 cells remained active at the end of the treatment. We investigated if the ISR is  
349 reversed during the long-term dual-Mi (24- hours) in Huh7.5 cells. eIF4E remained  
350 inhibited throughout the inhibition period, confirming the sustained inhibition of the  
351 MAPKs (Figure 8B). Interestingly, eIF2 $\alpha$  remained phosphorylated until 12- hours  
352 post treatment and subsequently returned to the basal levels (Figure 8B), indicating  
353 that the ISR was reversed by 24- hours. Since Akt is an important regulator in cell  
354 survival (44), we studied its phosphorylation. The surviving cells indeed displayed  
355 higher phosphorylation of Akt from 4- hours of treatment onwards and gradually  
356 increased until 24- hours (Figure 8C). These results demonstrate that despite a  
357 severe inhibition of translation activities by dual-Mi, a significant fraction of the cells  
358 recover from this inhibition over a period time and we speculate that Akt could be an  
359 important player in this survival.

### 360 **Mnk1/2 inhibition promotes Akt phosphorylation**

361 While investigating the potential mechanism of activation of Akt phosphorylation  
362 during the prolonged dual-Mi, we noticed that Mnk1/2 inhibition for 1- hour resulted in  
363 higher S473 Akt phosphorylation in a dose-dependent manner (Figure 8D) indicating  
364 that Mnk1/2 inhibition is inducing mTORC2. As in the case of Mnk1/2 (Figure 5C),  
365 the concurrent inhibitions of Akt and Mnk1/2 failed to make any change in the  
366 phosphorylation status of eIF2 $\alpha$  (Figure 8E), ruling out the involvement of Akt during

367 dual-Mi. However, it is compelling to suggest that Akt phosphorylation during  
368 prolonged dual-Mi could be important in the survival of the cells.

## 369 **DISCUSSION**

370 Being a complex process, translation is often studied from single-pathway  
371 perspectives. Recent advancements in RNA deep sequencing and ribosome profiling  
372 has revolutionized the field by enabling identification of the transcripts that are  
373 regulated by distinct signal pathways at multiple stages of the process. However, the  
374 cross talks between major pathways involved in the translation regulation need  
375 deeper understanding. A recent comprehensive report explained cross-talk between  
376 mTORC1 and eIF2 $\alpha$  pathways (29). Another report suggests that upon DNA  
377 damage, mTORC1 may regulate eIF2 $\alpha$  phosphorylation via PERK and GCN2, to  
378 promote cell migration (45). Yet another study proposes that HRI-mediated ISR may  
379 inhibit mTORC1 activity in the liver to mitigate ineffective erythropoiesis (46). In  
380 these contexts, our study reveals a central role of p38 and ERK1/2, two MAPKs that  
381 have been shown to influence translation initiation by phosphorylating eIF4E. Our  
382 study identifies a novel mechanism of regulation where p38 and ERK1/2 regulate  
383 eIF2 $\alpha$  phosphorylation and hence ISR. The impact of dual inhibition was profound  
384 and achieved near-total polysome dissociation that is not detected in any other  
385 individual conditions including mTOR inhibition and eIF2 $\alpha$  phosphorylation by known  
386 agents. Clearly, the two molecules synergistically regulated eIF2 $\alpha$ . Even as this  
387 study has not identified the specific kinase that mediates eIF2 $\alpha$  phosphorylation, it  
388 helps in characterizing a major mechanism that has not been reported before.

389 Our studies underline the importance of p38 in maintaining the translation  
390 homeostasis upon stress (47). p38, but not ERK1/2, was activated upon arsenite



391 treatment, indicating that the former is important in conditions of ISR. Interestingly,  
392 p38 phosphorylation did not lead to eIF4E phosphorylation suggesting the  
393 requirement of other factors in the regulation of the cap-binding protein. Additionally,  
394 ERK1/2 inhibition caused more noticeable dephosphorylation of eIF4E in all cell lines  
395 tested, implying the stronger influence by this MAPK. Although p38 activation upon  
396 arsenite treatment has been documented previously (48,49), our interests were to  
397 investigate its role in maintenance of translation under conditions of arsenite toxicity.  
398 Treatment of cells with arsenite and p38i simultaneously revealed a further depletion  
399 of polysomes, lending additional proof to its activation status under conditions of  
400 arsenite stress. Interestingly,

401 The most studied target of the two MAPKs in translation regulation is Mnk1/2.  
402 Previous studies have looked very closely at the role of Mnk1/2 and eIF4E  
403 phosphorylation in translation and their impact on global translation was less than  
404 appealing (50,51). Neither Mnk1/2 double knockout nor specific inhibitors have  
405 identified any significant impact on polysome assembly (12,52). Our studies using  
406 Mnk1/2 inhibitor are in total agreement with this. Importantly, Mnk1/2 inhibition did  
407 not bring about eIF2 $\alpha$  phosphorylation unlike dual-Mi did, thereby excluding its  
408 participation in the mechanism we describe. It would be interesting to characterize  
409 the involvement of the other known downstream targets of MAPKs, RSK and  
410 MAPKAPKs under similar conditions.

411 Despite playing a major role, eIF2 $\alpha$  phosphorylation alone cannot be implicated in  
412 the magnitude of translation arrest by dual-Mi. That is because eIF2 $\alpha$   
413 phosphorylation by various agents does not trigger such collapse in polysome  
414 assembly as in dual-Mi as demonstrated by our study and others (38,53,54). Thus  
415 dual-Mi appears to involve additional pathways and enforce a consolidated effect on

416 translation. mTORC1 does not appear to be a key player in this as it was not  
417 inhibited consistently across cell types during dual-Mi.

418 We considered whether Akt phosphorylation upon Mnk1/2 inhibition protects eIF2 $\alpha$   
419 from phosphorylation. However dual inhibition of Mnk1/2 and Akt failed to notice any  
420 change. Interestingly, dual-Mi prevented Akt phosphorylation for long duration further  
421 strengthening the possibility of Akt phosphorylation in the process. However,  
422 appearance of phospho-Akt from 4- hours onwards indicated its possible role in the  
423 diminishing effects of dual-Mi and revival of the cells. As an upstream effector of the  
424 mTOR pathway that senses nutrient and oxygen deprivation and as a pro-survival  
425 signal, activation of Akt is an intriguing observation that suggests a possible  
426 feedback mechanism that initiates at later time points in dual-Mi.

427 Specificity and universal appeal of our findings were strengthened by the  
428 consistency of the observations across three distinct cell lines. The original objective  
429 of this study was to investigate the impact of total dephosphorylation of eIF4E on the  
430 polysome association and hence we consciously chose higher concentrations of  
431 MAPK inhibitors. eIF2 $\alpha$  phosphorylation, the key finding in this study, was induced  
432 even at lower concentrations of inhibitors and followed a dose-dependency indicating  
433 the specificity of their effect. In addition, the cell viability was only moderate at 1-  
434 hour inhibition when most of our studies were performed.

435 Dual-Mi had prolonged effect on eIF2 $\alpha$  phosphorylation. The inhibitors caused  
436 phosphorylation as long as 12- hours indicating that feedback mechanisms to  
437 neutralize ISR were not effective. One major question is how the cells are able to  
438 sustain without crashing during a severe translational repression. Quite clearly, a set  
439 of proteins critical for survival were being translated despite very low translation

440 activities. It would be interesting to identify such proteins and the mechanisms that  
441 allow their translation. Activation of cap-independent mechanism is quite well  
442 accepted under conditions of translation suppression by mTORC1 inhibition (55).  
443 However, since dual-Mi caused severe suppression of cap-independent translation  
444 as well, the translating proteins are less likely to use this mode of translation.  
445 ERK1/2 activation promotes cell survival and proliferation in response to growth  
446 stimuli by driving the expression of pro-survival proteins. Response of p38 to stress  
447 stimuli depends more on the kinetics of its activation and can thus be either pro-  
448 survival or pro-apoptotic (56). Comparing our long duration dual-Mi observations to  
449 current understandings of MAPK signalling, it is possible that this cross-talk between  
450 MAPKs in general is allowing cells to remain viable despite seemingly negligible  
451 amounts of translation in the presence of high levels of eIF2 $\alpha$  phosphorylation.

452 All MAPKs are known to respond to ER-stress in a myriad of ways, from  
453 transcriptionally upregulating pro-survival molecules, to stemming apoptotic signals,  
454 and seem to behave differently in different cell lines. p38 activation during ER-stress  
455 has been shown to cause switch from autophagy to apoptosis, mediated by PERK  
456 and eIF2 $\alpha$  (57). MEK-ERK signalling has also been shown to be necessary for  
457 combating amino-acid deprivation in hepatocytes through GCN2 activation (58).

458 These studies primarily see MAPK activation as a response to ISR that help combat  
459 the stress. Our studies also demonstrate that p38 is critical in the basal translation  
460 activities during stress. However, we also demonstrate that inhibition of these  
461 MAPKs can cause severe ISR. From our studies, p38 appears to be more critical to  
462 the balance in translation activities. Though inhibition of either of the two MAPKs  
463 caused eIF2 $\alpha$  phosphorylation, only p38, not ERK1/2, was activated upon ISR  
464 induction. Since p38 inhibition causes ISR and eIF2 $\alpha$  phosphorylation, we speculate

465 that the subsequent feedback phosphorylation of p38 could be critical in limiting the  
466 ISR and stabilizing translation. Thus p38 seems to be a critical molecule in the post-  
467 ISR rescue of translation activities. Additionally, p38 could also be critical in  
468 maintaining the low translation activities during ISR.

#### 469 **Author contributions**

470 S.P., H.P., and K.H.H., conceived the study. S.P., H.P., D.V., D.G., and H.G.N  
471 performed the experiments. S.P., H.P., and K.H.H., analyzed the results. K.H.H  
472 wrote the manuscript while S.P., and H.P., edited it.

#### 473 **Acknowledgement**

474 We thank Rupesh Balaji for assisting in polysome profiling. Special thanks to Mohan  
475 Singh for logistical assistance for several experiments. HCV-IRES and EMCV-IRES  
476 constructs were kind gifts from Dr. Saumitra Das.

#### 477 **Funding**

478 This work was supported by funding from Department of Biotechnology, Govt. of  
479 India (BT/PR21356/MED/30/1779/2016). S.P, H.P and D.G received fellowships  
480 from Council of Scientific and Industrial Research, Govt. of India.

#### 481 **REFERENCES**

- 482 1. Gebauer, F., and Hentze, M. W. (2004) Molecular mechanisms of translational control.  
483 *Nature reviews. Molecular cell biology* **5**, 827-835
- 484 2. Duncan, R., Milburn, S. C., and Hershey, J. W. (1987) Regulated phosphorylation and low  
485 abundance of HeLa cell initiation factor eIF-4F suggest a role in translational control. Heat  
486 shock effects on eIF-4F. *The Journal of biological chemistry* **262**, 380-388
- 487 3. Pyronnet, S., Imataka, H., Gingras, A. C., Fukunaga, R., Hunter, T., and Sonenberg, N. (1999)  
488 Human eukaryotic translation initiation factor 4G (eIF4G) recruits mnk1 to phosphorylate  
489 eIF4E. *The EMBO journal* **18**, 270-279
- 490 4. Joshi, B., Cai, A. L., Keiper, B. D., Minich, W. B., Mendez, R., Beach, C. M., Stepinski, J.,  
491 Stolarski, R., Darzynkiewicz, E., and Rhoads, R. E. (1995) Phosphorylation of eukaryotic  
492 protein synthesis initiation factor 4E at Ser-209. *The Journal of biological chemistry* **270**,  
493 14597-14603
- 494 5. Waskiewicz, A. J., Flynn, A., Proud, C. G., and Cooper, J. A. (1997) Mitogen-activated protein  
495 kinases activate the serine/threonine kinases Mnk1 and Mnk2. *The EMBO journal* **16**, 1909-  
496 1920

- 497 6. Morley, S. J. (1997) Intracellular signalling pathways regulating initiation factor eIF4E  
498 phosphorylation during the activation of cell growth. *Biochemical Society transactions* **25**,  
499 503-509
- 500 7. Scheper, G. C., and Proud, C. G. (2002) Does phosphorylation of the cap-binding protein  
501 eIF4E play a role in translation initiation? *European journal of biochemistry* **269**, 5350-5359
- 502 8. Lazaris-Karatzas, A., Montine, K. S., and Sonenberg, N. (1990) Malignant transformation by a  
503 eukaryotic initiation factor subunit that binds to mRNA 5' cap. *Nature* **345**, 544-547
- 504 9. Furic, L., Rong, L., Larsson, O., Koumakpayi, I. H., Yoshida, K., Brueschke, A., Petroulakis, E.,  
505 Robichaud, N., Pollak, M., Gaboury, L. A., Pandolfi, P. P., Saad, F., and Sonenberg, N. (2010)  
506 eIF4E phosphorylation promotes tumorigenesis and is associated with prostate cancer  
507 progression. *Proceedings of the National Academy of Sciences of the United States of*  
508 *America* **107**, 14134-14139
- 509 10. Topisirovic, I., Ruiz-Gutierrez, M., and Borden, K. L. (2004) Phosphorylation of the eukaryotic  
510 translation initiation factor eIF4E contributes to its transformation and mRNA transport  
511 activities. *Cancer research* **64**, 8639-8642
- 512 11. Carroll, M., and Borden, K. L. (2013) The oncogene eIF4E: using biochemical insights to target  
513 cancer. *J Interferon Cytokine Res* **33**, 227-238
- 514 12. Ueda, T., Watanabe-Fukunaga, R., Fukuyama, H., Nagata, S., and Fukunaga, R. (2004) Mnk2  
515 and Mnk1 are essential for constitutive and inducible phosphorylation of eukaryotic  
516 initiation factor 4E but not for cell growth or development. *Mol Cell Biol* **24**, 6539-6549
- 517 13. Siddiqui, N., and Sonenberg, N. (2015) Signalling to eIF4E in cancer. *Biochemical Society*  
518 *transactions* **43**, 763-772
- 519 14. Herdy, B., Jaramillo, M., Svitkin, Y. V., Rosenfeld, A. B., Kobayashi, M., Walsh, D., Alain, T.,  
520 Sean, P., Robichaud, N., Topisirovic, I., Furic, L., Dowling, R. J. O., Sylvestre, A., Rong, L.,  
521 Colina, R., Costa-Mattioli, M., Fritz, J. H., Olivier, M., Brown, E., Mohr, I., and Sonenberg, N.  
522 (2012) Translational control of the activation of transcription factor NF-kappaB and  
523 production of type I interferon by phosphorylation of the translation factor eIF4E. *Nat*  
524 *Immunol* **13**, 543-550
- 525 15. Brown, E. J., Albers, M. W., Shin, T. B., Ichikawa, K., Keith, C. T., Lane, W. S., and Schreiber, S.  
526 L. (1994) A mammalian protein targeted by G1-arresting rapamycin-receptor complex.  
527 *Nature* **369**, 756-758
- 528 16. Sabatini, D. M., Erdjument-Bromage, H., Lui, M., Tempst, P., and Snyder, S. H. (1994) RAFT1:  
529 a mammalian protein that binds to FKBP12 in a rapamycin-dependent fashion and is  
530 homologous to yeast TORs. *Cell* **78**, 35-43
- 531 17. Saxton, R. A., and Sabatini, D. M. (2017) mTOR Signaling in Growth, Metabolism, and  
532 Disease. *Cell* **168**, 960-976
- 533 18. Wullschlegel, S., Loewith, R., and Hall, M. N. (2006) TOR signaling in growth and metabolism.  
534 *Cell* **124**, 471-484
- 535 19. Hay, N., and Sonenberg, N. (2004) Upstream and downstream of mTOR. *Genes &*  
536 *development* **18**, 1926-1945
- 537 20. Wang, X., and Proud, C. G. (2011) mTORC1 signaling: what we still don't know. *Journal of*  
538 *molecular cell biology* **3**, 206-220
- 539 21. Jefferies, H. B., Reinhard, C., Kozma, S. C., and Thomas, G. (1994) Rapamycin selectively  
540 represses translation of the "polypyrimidine tract" mRNA family. *Proceedings of the National*  
541 *Academy of Sciences of the United States of America* **91**, 4441-4445
- 542 22. Thoreen, C. C., Chantranupong, L., Keys, H. R., Wang, T., Gray, N. S., and Sabatini, D. M.  
543 (2012) A unifying model for mTORC1-mediated regulation of mRNA translation. *Nature* **485**,  
544 109-113
- 545 23. Hsieh, A. C., Costa, M., Zollo, O., Davis, C., Feldman, M. E., Testa, J. R., Meyuhos, O., Shokat,  
546 K. M., and Ruggero, D. (2010) Genetic dissection of the oncogenic mTOR pathway reveals  
547 druggable addiction to translational control via 4EBP-eIF4E. *Cancer cell* **17**, 249-261

- 548 24. Thoreen, C. C., Kang, S. A., Chang, J. W., Liu, Q., Zhang, J., Gao, Y., Reichling, L. J., Sim, T.,  
549 Sabatini, D. M., and Gray, N. S. (2009) An ATP-competitive mammalian target of rapamycin  
550 inhibitor reveals rapamycin-resistant functions of mTORC1. *The Journal of biological*  
551 *chemistry* **284**, 8023-8032
- 552 25. Hsieh, A. C., Liu, Y., Edlind, M. P., Ingolia, N. T., Janes, M. R., Sher, A., Shi, E. Y., Stumpf, C. R.,  
553 Christensen, C., Bonham, M. J., Wang, S., Ren, P., Martin, M., Jessen, K., Feldman, M. E.,  
554 Weissman, J. S., Shokat, K. M., Rommel, C., and Ruggero, D. (2012) The translational  
555 landscape of mTOR signalling steers cancer initiation and metastasis. *Nature* **485**, 55-61
- 556 26. Hinnebusch, A. G. (2014) The scanning mechanism of eukaryotic translation initiation.  
557 *Annual review of biochemistry* **83**, 779-812
- 558 27. Jackson, R. J., Hellen, C. U., and Pestova, T. V. (2010) The mechanism of eukaryotic  
559 translation initiation and principles of its regulation. *Nature reviews. Molecular cell biology*  
560 **11**, 113-127
- 561 28. Andreev, D. E., O'Connor, P. B., Fahey, C., Kenny, E. M., Terenin, I. M., Dmitriev, S. E.,  
562 Cormican, P., Morris, D. W., Shatsky, I. N., and Baranov, P. V. (2015) Translation of 5' leaders  
563 is pervasive in genes resistant to eIF2 repression. *eLife* **4**, e03971
- 564 29. Klann, K., Tascher, G., and Munch, C. (2020) Functional Translatome Proteomics Reveal  
565 Converging and Dose-Dependent Regulation by mTORC1 and eIF2alpha. *Mol Cell* **77**, 913-925  
566 e914
- 567 30. Carriere, A., Romeo, Y., Acosta-Jaquez, H. A., Moreau, J., Bonneil, E., Thibault, P., Fingar, D.  
568 C., and Roux, P. P. (2011) ERK1/2 phosphorylate Raptor to promote Ras-dependent  
569 activation of mTOR complex 1 (mTORC1). *The Journal of biological chemistry* **286**, 567-577
- 570 31. Joubert, P. E., Stapleford, K., Guivel-Benhassine, F., Vignuzzi, M., Schwartz, O., and Albert, M.  
571 L. (2015) Inhibition of mTORC1 Enhances the Translation of Chikungunya Proteins via the  
572 Activation of the MnK/eIF4E Pathway. *PLoS pathogens* **11**, e1005091
- 573 32. Wengrod, J. C., and Gardner, L. B. (2015) Cellular adaptation to nutrient deprivation:  
574 crosstalk between the mTORC1 and eIF2alpha signaling pathways and implications for  
575 autophagy. *Cell Cycle* **14**, 2571-2577
- 576 33. George, A., Panda, S., Kudmulwar, D., Chhatbar, S. P., Nayak, S. C., and Krishnan, H. H. (2012)  
577 Hepatitis C virus NS5A binds to the mRNA cap-binding eukaryotic translation initiation 4F  
578 (eIF4F) complex and up-regulates host translation initiation machinery through eIF4E-  
579 binding protein 1 inactivation. *The Journal of biological chemistry* **287**, 5042-5058
- 580 34. Wang, X., Flynn, A., Waskiewicz, A. J., Webb, B. L., Vries, R. G., Baines, I. A., Cooper, J. A., and  
581 Proud, C. G. (1998) The phosphorylation of eukaryotic initiation factor eIF4E in response to  
582 phorbol esters, cell stresses, and cytokines is mediated by distinct MAP kinase pathways. *The*  
583 *Journal of biological chemistry* **273**, 9373-9377
- 584 35. Waskiewicz, A. J., Johnson, J. C., Penn, B., Mahalingam, M., Kimball, S. R., and Cooper, J. A.  
585 (1999) Phosphorylation of the cap-binding protein eukaryotic translation initiation factor 4E  
586 by protein kinase Mnk1 in vivo. *Mol Cell Biol* **19**, 1871-1880
- 587 36. Blobel, G., and Sabatini, D. (1971) Dissociation of mammalian polyribosomes into subunits  
588 by puromycin. *Proceedings of the National Academy of Sciences of the United States of*  
589 *America* **68**, 390-394
- 590 37. Whitmarsh, A. J. (2010) A central role for p38 MAPK in the early transcriptional response to  
591 stress. *BMC Biol* **8**, 47
- 592 38. McEwen, E., Kedersha, N., Song, B., Scheuner, D., Gilks, N., Han, A., Chen, J. J., Anderson, P.,  
593 and Kaufman, R. J. (2005) Heme-regulated inhibitor kinase-mediated phosphorylation of  
594 eukaryotic translation initiation factor 2 inhibits translation, induces stress granule  
595 formation, and mediates survival upon arsenite exposure. *The Journal of biological chemistry*  
596 **280**, 16925-16933
- 597 39. Brostrom, C. O., Prostko, C. R., Kaufman, R. J., and Brostrom, M. A. (1996) Inhibition of  
598 translational initiation by activators of the glucose-regulated stress protein and heat shock

- 599 protein stress response systems. Role of the interferon-inducible double-stranded RNA-  
600 activated eukaryotic initiation factor 2alpha kinase. *The Journal of biological chemistry* **271**,  
601 24995-25002
- 602 40. Sun, H., Yang, Y., Shao, H., Sun, W., Gu, M., Wang, H., Jiang, L., Qu, L., Sun, D., and Gao, Y.  
603 (2017) Sodium Arsenite-Induced Learning and Memory Impairment Is Associated with  
604 Endoplasmic Reticulum Stress-Mediated Apoptosis in Rat Hippocampus. *Frontiers in*  
605 *Molecular Neuroscience* **10**
- 606 41. Taniuchi, S., Miyake, M., Tsugawa, K., Oyadomari, M., and Oyadomari, S. (2016) Integrated  
607 stress response of vertebrates is regulated by four eIF2 $\alpha$  kinases. *Scientific reports* **6**, 32886
- 608 42. Holcik, M., and Sonenberg, N. (2005) Translational control in stress and apoptosis. *Nature*  
609 *reviews. Molecular cell biology* **6**, 318-327
- 610 43. Pudi, R., Srinivasan, P., and Das, S. (2004) La protein binding at the GCAC site near the  
611 initiator AUG facilitates the ribosomal assembly on the hepatitis C virus RNA to influence  
612 internal ribosome entry site-mediated translation. *The Journal of biological chemistry* **279**,  
613 29879-29888
- 614 44. Hemmings, B. A., and Restuccia, D. F. (2012) PI3K-PKB/Akt pathway. *Cold Spring Harbor*  
615 *perspectives in biology* **4**, a011189
- 616 45. Harvey, R. F., Poyry, T. A. A., Stoneley, M., and Willis, A. E. (2019) Signaling from mTOR to  
617 eIF2alpha mediates cell migration in response to the chemotherapeutic doxorubicin. *Sci*  
618 *Signal* **12**
- 619 46. Zhang, S., Macias-Garcia, A., Velazquez, J., Paltrinieri, E., Kaufman, R. J., and Chen, J. J. (2018)  
620 HRI coordinates translation by eIF2 $\alpha$ P and mTORC1 to mitigate ineffective erythropoiesis in  
621 mice during iron deficiency. *Blood* **131**, 450-461
- 622 47. Akkari, L., Gregoire, D., Floc'h, N., Moreau, M., Hernandez, C., Simonin, Y., Rosenberg, A. R.,  
623 Lassus, P., and Hibner, U. (2012) Hepatitis C viral protein NS5A induces EMT and participates  
624 in oncogenic transformation of primary hepatocyte precursors. *J Hepatol* **57**, 1021-1028
- 625 48. Elbirt, K. K., Whitmarsh, A. J., Davis, R. J., and Bonkovsky, H. L. (1998) Mechanism of sodium  
626 arsenite-mediated induction of heme oxygenase-1 in hepatoma cells. Role of mitogen-  
627 activated protein kinases. *The Journal of biological chemistry* **273**, 8922-8931
- 628 49. Kim, J. Y., Choi, J. A., Kim, T. H., Yoo, Y. D., Kim, J. I., Lee, Y. J., Yoo, S. Y., Cho, C. K., Lee, Y. S.,  
629 and Lee, S. J. (2002) Involvement of p38 mitogen-activated protein kinase in the cell growth  
630 inhibition by sodium arsenite. *Journal of cellular physiology* **190**, 29-37
- 631 50. McKendrick, L., Morley, S. J., Pain, V. M., Jagus, R., and Joshi, B. (2001) Phosphorylation of  
632 eukaryotic initiation factor 4E (eIF4E) at Ser209 is not required for protein synthesis in vitro  
633 and in vivo. *European journal of biochemistry* **268**, 5375-5385
- 634 51. Bianchini, A., Loiarro, M., Bielli, P., Busà, R., Paronetto, M. P., Loreni, F., Geremia, R., and  
635 Sette, C. (2008) Phosphorylation of eIF4E by MNKs supports protein synthesis, cell cycle  
636 progression and proliferation in prostate cancer cells. *Carcinogenesis* **29**, 2279-2288
- 637 52. Grzmil, M., Morin, P., Jr., Lino, M. M., Merlo, A., Frank, S., Wang, Y., Moncayo, G., and  
638 Hemmings, B. A. (2011) MAP kinase-interacting kinase 1 regulates SMAD2-dependent TGF-  
639 beta signaling pathway in human glioblastoma. *Cancer research* **71**, 2392-2402
- 640 53. Baird, T. D., Palam, L. R., Fusakio, M. E., Willy, J. A., Davis, C. M., McClintick, J. N., Anthony, T.  
641 G., and Wek, R. C. (2014) Selective mRNA translation during eIF2 phosphorylation induces  
642 expression of IBTK $\alpha$ . *Molecular biology of the cell* **25**, 1686-1697
- 643 54. Romero, A. M., Ramos-Alonso, L., Alepuz, P., Puig, S., and Martinez-Pastor, M. T. (2020)  
644 Global translational repression induced by iron deficiency in yeast depends on the  
645 Gcn2/eIF2alpha pathway. *Scientific reports* **10**, 233
- 646 55. Muranen, T., Selfors, L. M., Worster, D. T., Iwanicki, M. P., Song, L., Morales, F. C., Gao, S.,  
647 Mills, G. B., and Brugge, J. S. (2012) Inhibition of PI3K/mTOR leads to adaptive resistance in  
648 matrix-attached cancer cells. *Cancer cell* **21**, 227-239

- 649 56. Darling, N. J., and Cook, S. J. (2014) The role of MAPK signalling pathways in the response to  
650 endoplasmic reticulum stress. *Biochimica et biophysica acta* **1843**, 2150-2163
- 651 57. Jiang, Q., Li, F., Shi, K., Wu, P., An, J., Yang, Y., and Xu, C. (2014) Involvement of p38 in signal  
652 switching from autophagy to apoptosis via the PERK/eIF2 $\alpha$ /ATF4 axis in selenite-treated NB4  
653 cells. *Cell Death & Disease* **5**, e1270-e1270
- 654 58. Thiaville, M. M., Pan, Y. X., Gjymishka, A., Zhong, C., Kaufman, R. J., and Kilberg, M. S. (2008)  
655 MEK signaling is required for phosphorylation of eIF2alpha following amino acid limitation of  
656 HepG2 human hepatoma cells. *The Journal of biological chemistry* **283**, 10848-10857

657

658

659

660

661

662

663

664

665

666

667

668

669

670

671

672

673

674

675

676

677



678 Figure 1

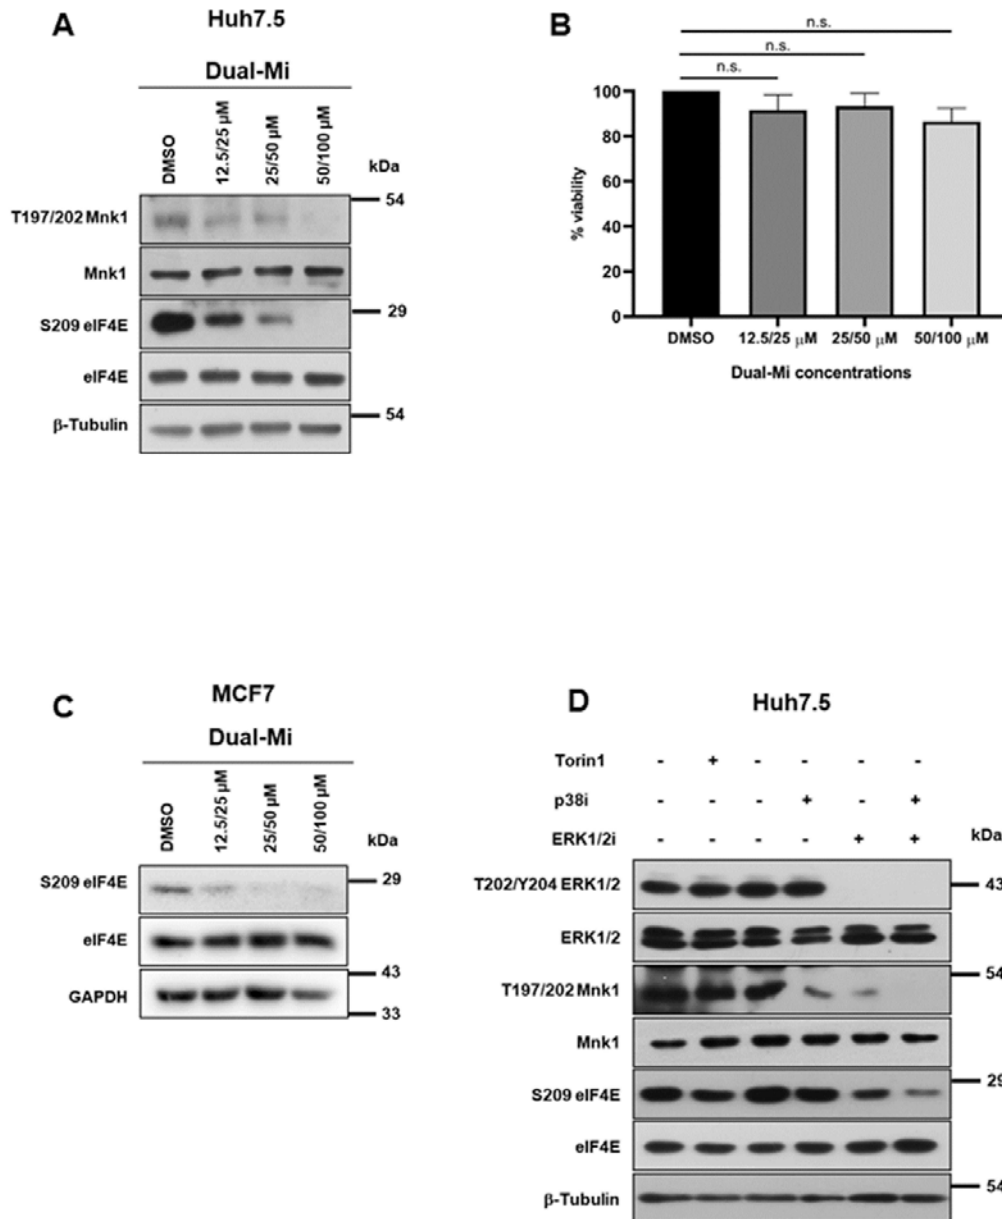

679

680

681

682

683

684

685 Figure 2

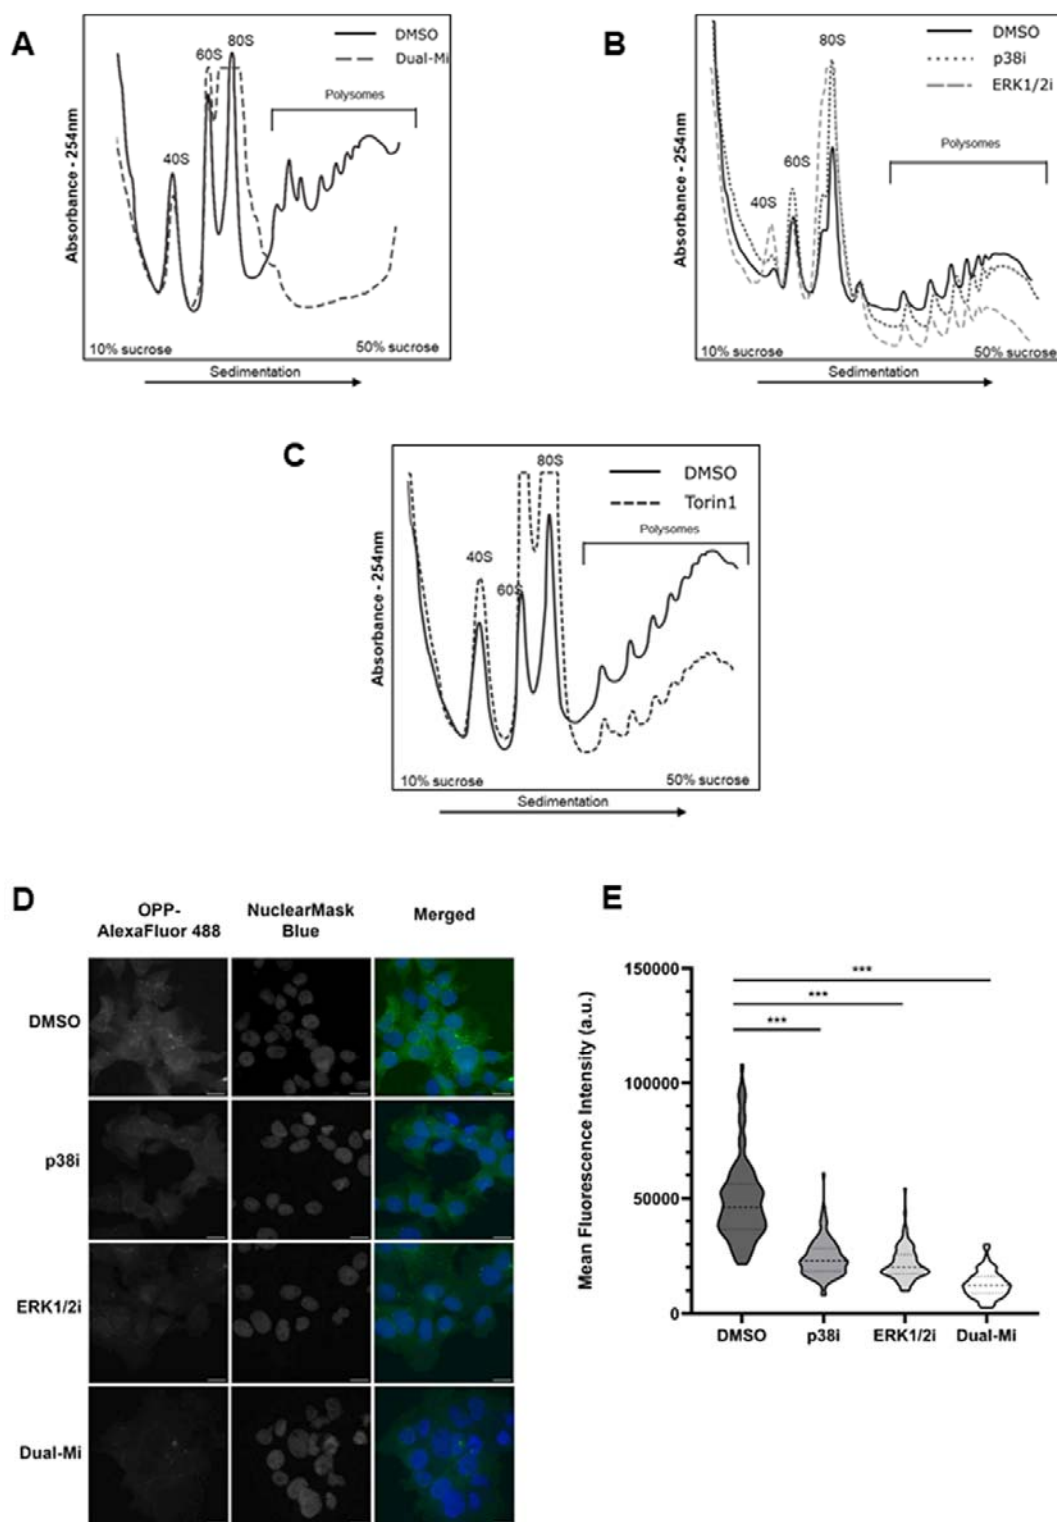

686

687

688 Figure 3

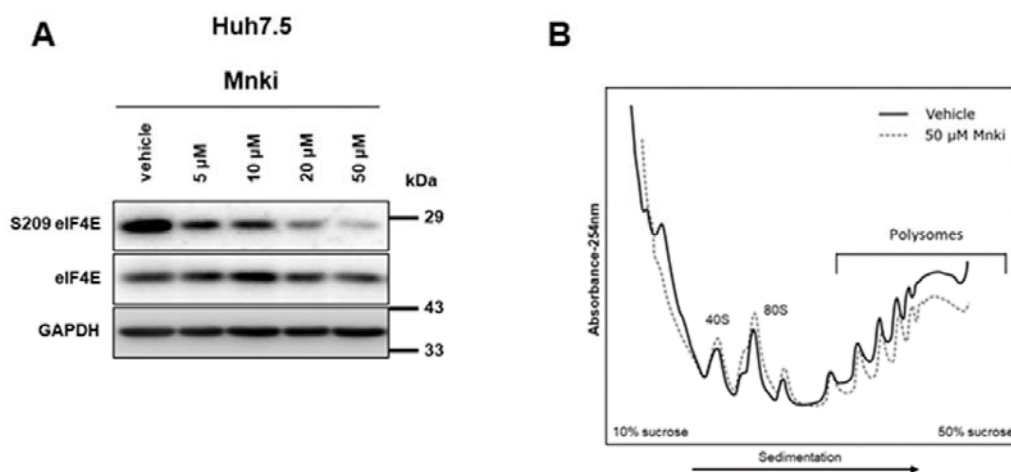

689

690

691

692

693

694

695

696

697

698

699

700

701

702

703 Figure 4

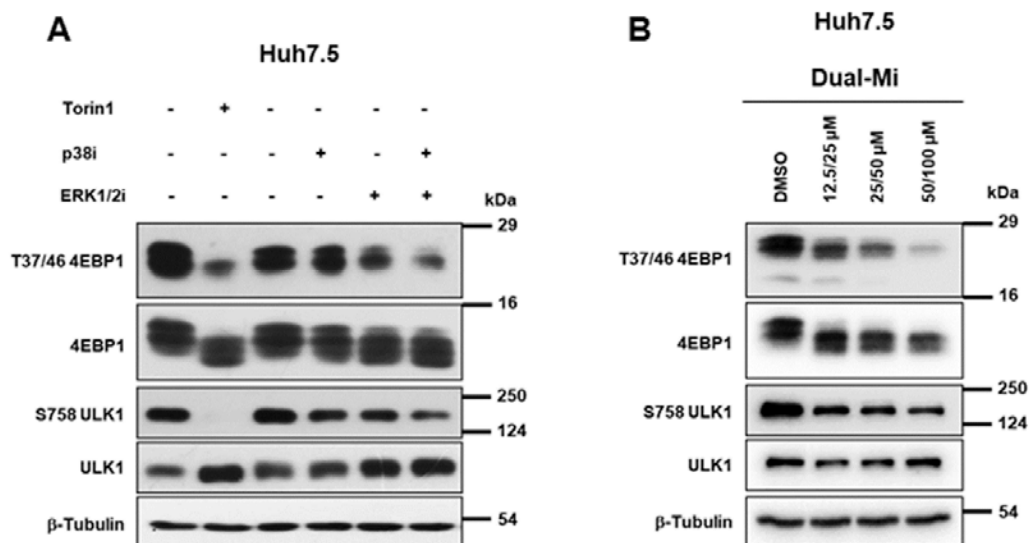

704

705

706

707

708

709

710

711

712

713

714

715

716

717

718 Figure 5

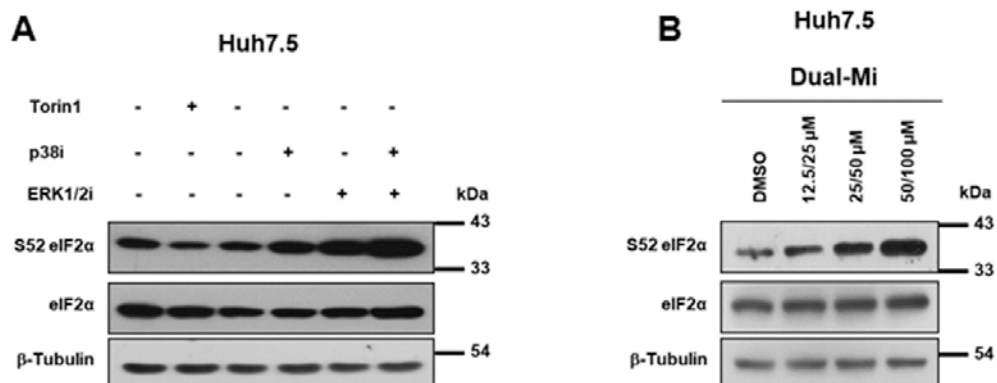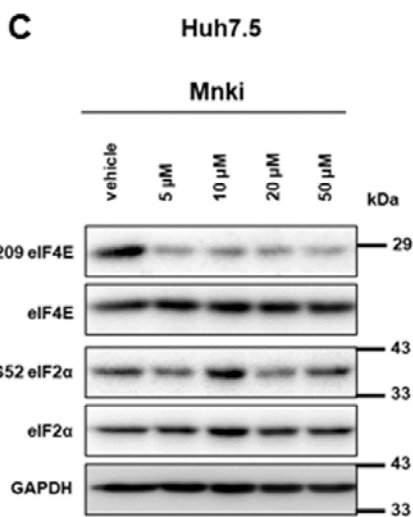

719

720

721

722

723

724

725 Figure 6

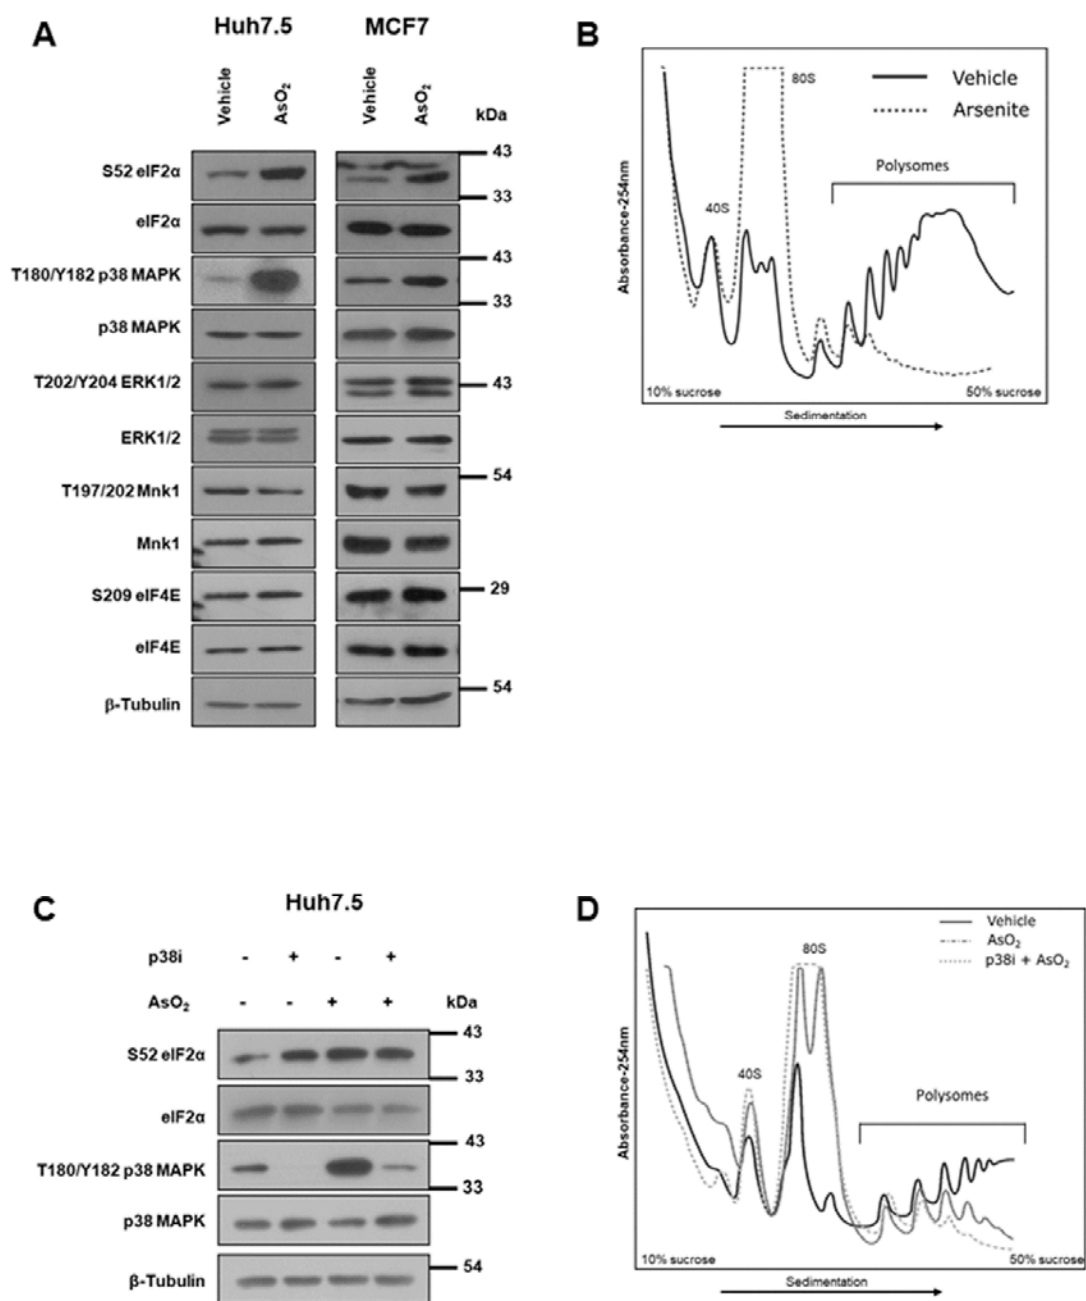

726

727

728

729

730 Figure 7

731

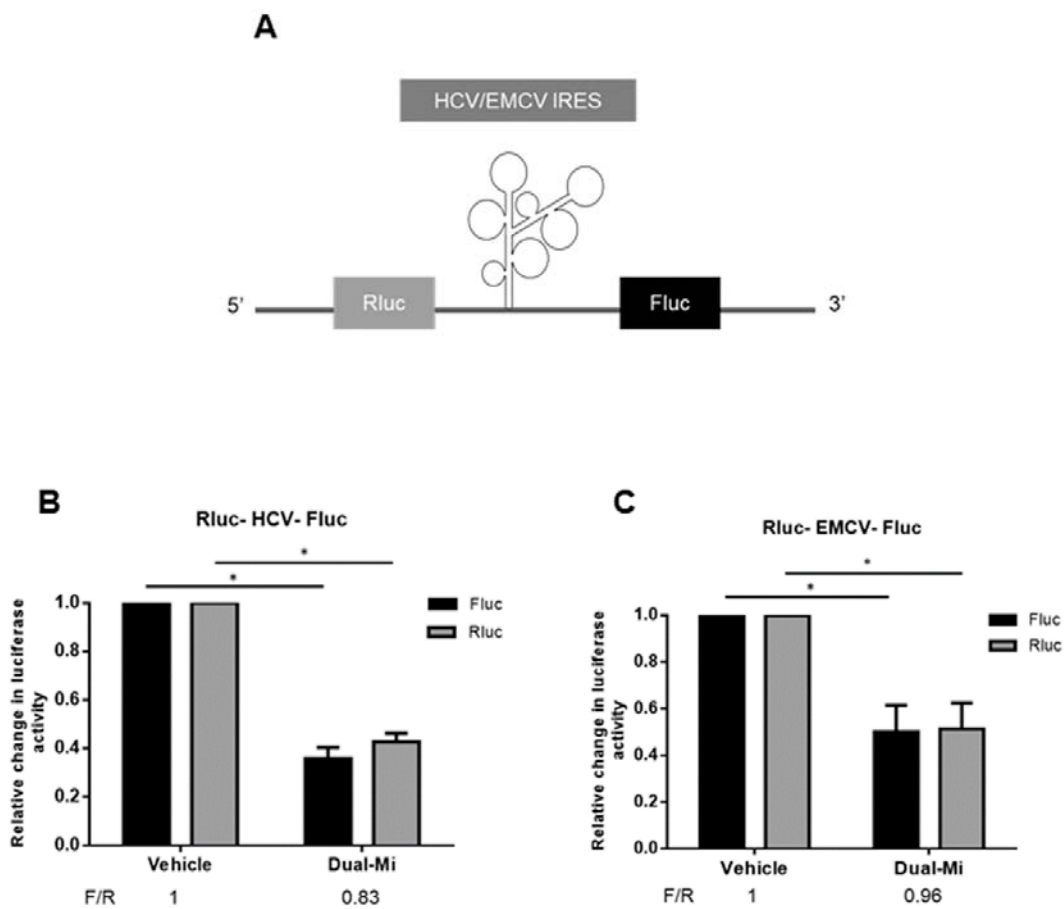

732

733 Figure 8

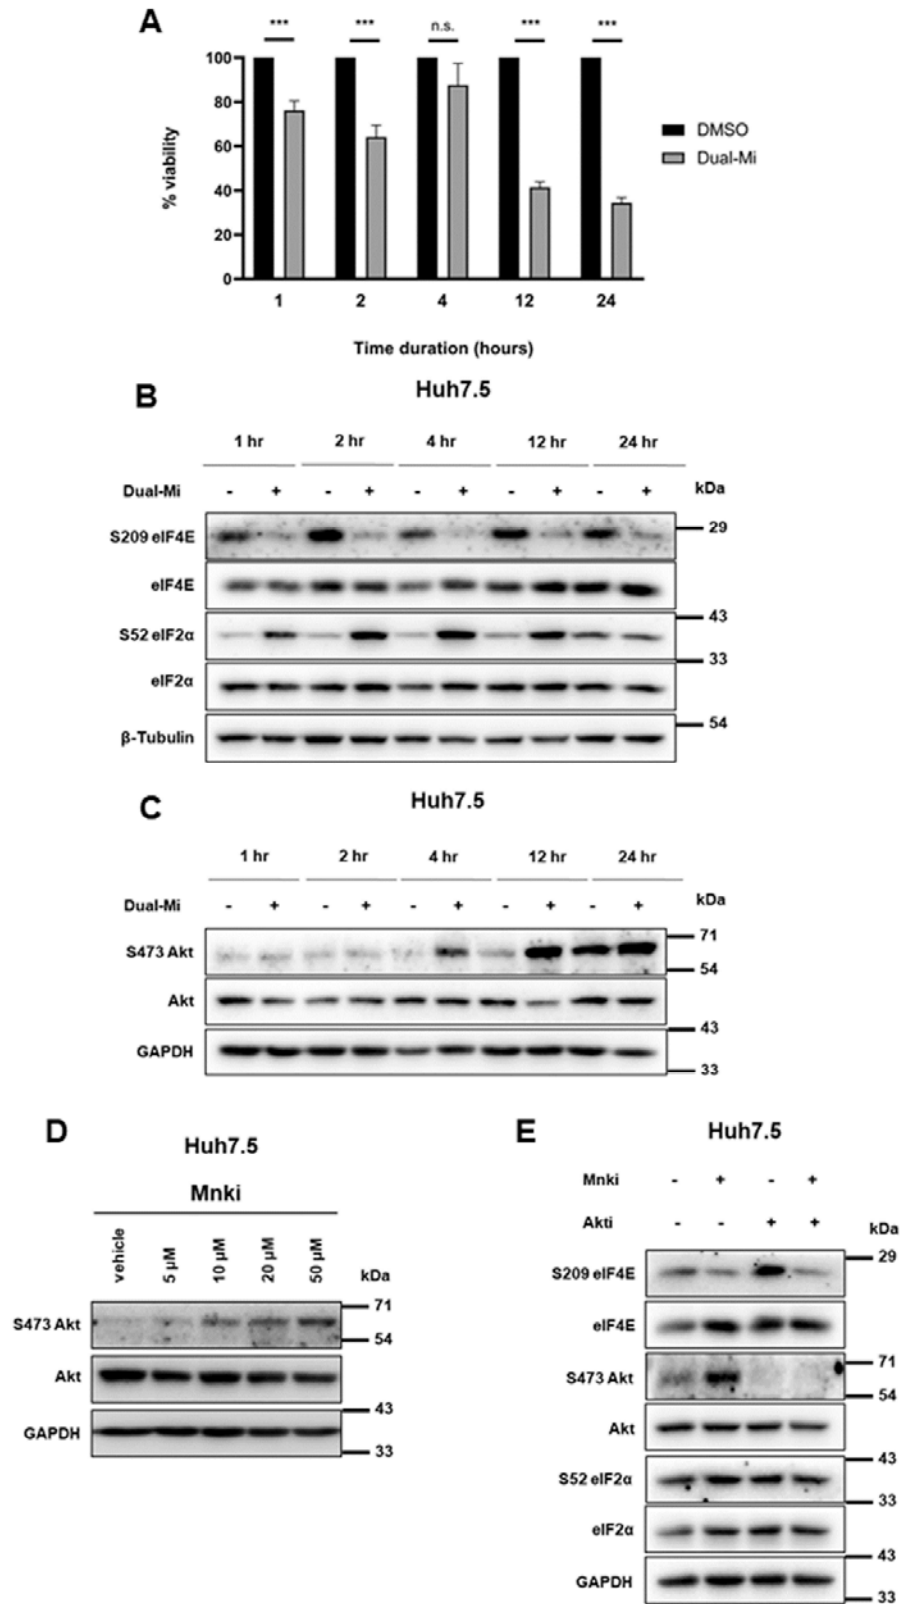

734



735 **LEGENDS**

736 **Figure 1. p38 and ERK1/2 MAPK co-inhibition causes dose dependent**  
737 **decrease in eIF4E phosphorylation. (A)** Immunoblots depicting phosphorylation  
738 and expression status of Mnk1 and eIF4E from Huh7.5 cells upon treatment with  
739 12.5/25, 25/50, or 50/100  $\mu$ M of dual-MAPK inhibitors (Dual-Mi) for 1- hour along  
740 with DMSO vehicle control. **(B)** Huh7.5 cell viability was measured upon treatment  
741 with DMSO vehicle or different concentrations of inhibitors for 1- hour using trypan  
742 blue exclusion method. Graph is representative of 3 independent experiments. The  
743 statistical significance was calculated using two tailed, paired Student's *t* test where  
744 n.s. represents non-significant. **(C)** Immunoblots depicting phosphorylation and  
745 expression of eIF4E from MCF7 cells upon similar treatment as in (A). **(D)**  
746 Immunoblots depicting phosphorylation and expression status of ERK1/2, Mnk1, and  
747 eIF4E from Huh7.5 cells treated with DMSO vehicle control, Torin1 (750 nM), p38i  
748 (50  $\mu$ M), ERK1/2i (100  $\mu$ M), or Dual-Mi (50/100  $\mu$ M p38i/ERK1/2i). Lanes 1 and 3 are  
749 independent vehicle controls for Torin1 and MAPK inhibitors, respectively. p38i-p38  
750 MAPK inhibitor VIII, ERK1/2i-U0126, Dual-Mi-p38i+ERK1/2i.

751 **Figure 2. p38 and ERK1/2 MAPK dual inhibition severely affects polysome**  
752 **stability and suppresses translation. (A-C)** Polysome profiles of Huh7.5 cells  
753 treated with DMSO vehicle control or specific inhibitor(s) for 1- hour. Polysome  
754 profile analyses were performed after density gradient ultracentrifugation of the  
755 corresponding cytosolic extract. Free ribosomal subunits (40S and 60S), monosome  
756 (80S) and the polyribosomes were fractionated by measuring the absorbance at 254  
757 nm. Each graph shows treatment-curve overlaid on the vehicle control. **(A)** From  
758 dual-Mi (50/100  $\mu$ M p38i/ERK1/2i) treatment. **(B)** From p38i (50  $\mu$ M) and ERK1/2i  
759 (100  $\mu$ M) individual treatments. **(C)** From Torin1 (750 nM) treatment. **(D)**

760 Representative images from OPP-incorporation assay for assessing protein  
761 synthesis in DMSO, p38i (50  $\mu$ M), ERK1/2i (100  $\mu$ M) and dual-Mi (50/100  $\mu$ M  
762 p38i/ERK1/2i), performed in Huh7.5 cells. AlexaFluor 488 conjugated-OPP (green)  
763 was used to determine level of nascent protein synthesis. NuclearMask Blue (blue)  
764 was used to stain the nucleus. Images were captured at 20x magnification and the  
765 scale bar represents 20  $\mu$ m length. **(E)** Quantitative analysis of OPP-incorporation  
766 depicted as violin plots. Data represented is from ~90 cells as 3 independent  
767 experimental setups and is represented with median values and minimum and  
768 maximum quartiles, and  $p$ -value was calculated using one-way ANOVA; \*\*\*  
769 represents  $p < 0.0005$ .

770 **Figure 3. Polysome collapse caused by dual-Mi is independent of Mnk1/2**  
771 **inhibition and eIF4E dephosphorylation. (A)** Immunoblots depicting  
772 phosphorylation and expression status of eIF4E from Huh7.5 cells upon treatment  
773 with 5, 10, 20 or 50  $\mu$ M of Mnk1 for 1- hour along with water vehicle control. **(B)**  
774 Polysome profiles from Huh7.5 cells upon treatment with vehicle or Mnk1 (50  $\mu$ M) for  
775 1- hour. Free ribosomal subunits (40S and 60S), monosome (80S) and the  
776 polysomes were fractionated by measuring the absorbance at 254 nm after density  
777 gradient centrifugation of corresponding cytosolic extracts. The graph shows  
778 treatment-curve overlaid on the vehicle. Mnk1 - ETP-45835

779 **Figure 4. Dual-Mi causes moderate inhibition of mTORC1 activity in Huh7.5.**  
780 **(A)** Immunoblots depicting phosphorylation and expression status of 4EBP1 and  
781 ULK1 from Huh7.5 cells treated with DMSO vehicle control, Torin1 (750 nM), p38i  
782 (50  $\mu$ M), ERK1/2i (100  $\mu$ M), or Dual-Mi (50/100  $\mu$ M p38i/ERK1/2i) for 1- hour. **(B)**  
783 Immunoblot depicting phosphorylation and expression status of 4EBP1 and ULK1

784 from Huh7.5 cells upon treatment with 12.5/25, 25/50, or 50/100  $\mu\text{M}$  of p38i/ERK1/2i  
785 dual-MAPK inhibitors for 1- hour along with DMSO vehicle control.

786 **Figure 5. p38 and ERK1/2 MAPKs synergistically regulate eIF2 $\alpha$**

787 **phosphorylation independent of its common downstream kinase Mnk1/2. (A)**

788 Immunoblots depicting phosphorylation status of eIF2 $\alpha$  from Huh7.5 cells treated  
789 with DMSO vehicle control, Torin1 (750 nM), p38i (50  $\mu\text{M}$ ), ERK1/2i (100  $\mu\text{M}$ ) or  
790 Dual-Mi (50/100  $\mu\text{M}$  p38i /ERK1/2i) for 1- hour. **(B)** Immunoblots depicting  
791 phosphorylation and expression status of eIF2 $\alpha$  from Huh7.5 cells upon treatment  
792 with 12.5/25, 25/50, or 50/100  $\mu\text{M}$  of Dual-Mi for 1- hour along with DMSO vehicle  
793 control. **(C)** Immunoblots depicting phosphorylation of eIF4E and eIF2 $\alpha$  from Huh7.5  
794 cells upon treatment with 5, 10, 20 or 50  $\mu\text{M}$  of Mnk1 for 1- hour along with water  
795 vehicle control.

796 **Figure 6. Arsenite induced p38 MAPK activation is critical for polysome**

797 **stability. (A)** Immunoblots depicting phosphorylation and expression status of eIF2 $\alpha$ ,

798 p38 MAPK, ERK1/2, Mnk1 and eIF4E from Huh7.5 and MCF7 cells upon treatment  
799 with vehicle or sodium arsenite (40  $\mu\text{M}$ ) for 1- hour. **(B)** Polysome profiles from

800 Huh7.5 cells treated with vehicle or sodium arsenite (40  $\mu\text{M}$ ) for 1- hour. Free  
801 ribosomal subunits (40S and 60S), monosome (80S) and the polyribosomes were

802 fractionated by measuring the absorbance at 254 nm after density gradient  
803 centrifugation of corresponding cytosolic extracts. The graph shows treatment-curve

804 overlaid on that of the vehicle. **(C)** Immunoblots depicting phosphorylation and

805 expression status of eIF2 $\alpha$  and p38 MAPK upon treatment with vehicle, sodium  
806 arsenite (40  $\mu\text{M}$ ), p38i (50  $\mu\text{M}$ ) or both (40/50  $\mu\text{M}$  sodium arsenite/p38i) for 1- hour.

807 **(D)** Polysome profiles from Huh7.5 cells treated with vehicle, sodium arsenite (40

808  $\mu\text{M}$ ), or both (40/50  $\mu\text{M}$  sodium arsenite/p38i) for 1- hour. Free ribosomal subunits

809 (40S and 60S), monosome (80S) and the ribosomes were fractionated by measuring  
810 the absorbance at 254 nm after density gradient centrifugation of corresponding  
811 cytosolic extracts. The graph shows treatment-curve overlaid on the vehicle. AsO<sub>2</sub>-  
812 Sodium arsenite.

813 **Figure 7. Dual-Mi inhibits both cap-dependent and cap-independent**

814 **translation. (A)** Schematic representation of dual-luciferase reporter construct  
815 where HCV/EMCV IRES elements are sandwiched between *Renilla* (Rluc) and  
816 Firefly (Fluc) luciferase genes. **(B and C)** Luciferase assay in Huh7.5 lysates  
817 transfected with HCV **(B)** and EMCV **(C)** dual-luciferase reporter plasmids for 9-  
818 hours and further treatment either with vehicle or dual-Mi (50/100 μM p38i/ERK1/2i)  
819 for 1- hour. Relative change in luciferase activity was calculated by normalizing  
820 Fluc/Rluc reading of inhibitor treated cells with its corresponding vehicle control. *p*-  
821 value was calculated using two tailed, paired Student's *t*-test; \* represents *p* < 0.05.  
822 F/R ratio of each treatment is represented below each graph.

823 **Figure 8. Chronic inhibition of p38 and ERK1/2 MAPK results in activation of**

824 **alternate cell survival pathways to support cell sustenance. (A)** Viability of  
825 Huh7.5 cells upon treatment with DMSO vehicle control or dual-Mi (50/100 μM  
826 p38i/ERK1/2i) for 1-, 2-, 4-, 12- or 24- hours using MTT assay. Graph is  
827 representative of three independent experiments. *p*-value was calculated using two  
828 tailed, paired Student's *t*-test; where \*\*\* represents *p* < 0.0005 and n.s. represents  
829 non-significant. **(B)** Immunoblots depicting phosphorylation and expression status of  
830 eIF2α, eIF4E from Huh7.5 cells upon treatment with DMSO vehicle control or dual-Mi  
831 (50/100 μM p38i/ERK1/2i) for 1-, 2-, 4-, 12- or 24- hours. **(C)** Those of Akt from the  
832 same treatment as in (B). **(D)** Immunoblots depicting phosphorylation and expression  
833 status of Akt from Huh7.5 cells upon treatment with 5, 10, 20 or 50 μM of Mnki for 1

834 hour along with water vehicle control. **(E)** Immunoblots depicting phosphorylation  
835 and expression status of eIF4E, Akt and eIF2 $\alpha$  from Huh7.5 cells upon treatment  
836 with vehicle, Mnki (10  $\mu$ M), Akti (5  $\mu$ M) or both (10/5  $\mu$ M Mnki/Akti), Akti-Akt inhibitor

837 VIII.

838

839

840

841

842

843

844

845

846

847

848

849

850

851

852

853

854

855

856

857

858

859

860 **Supplementary information**

861 **Figure S1**

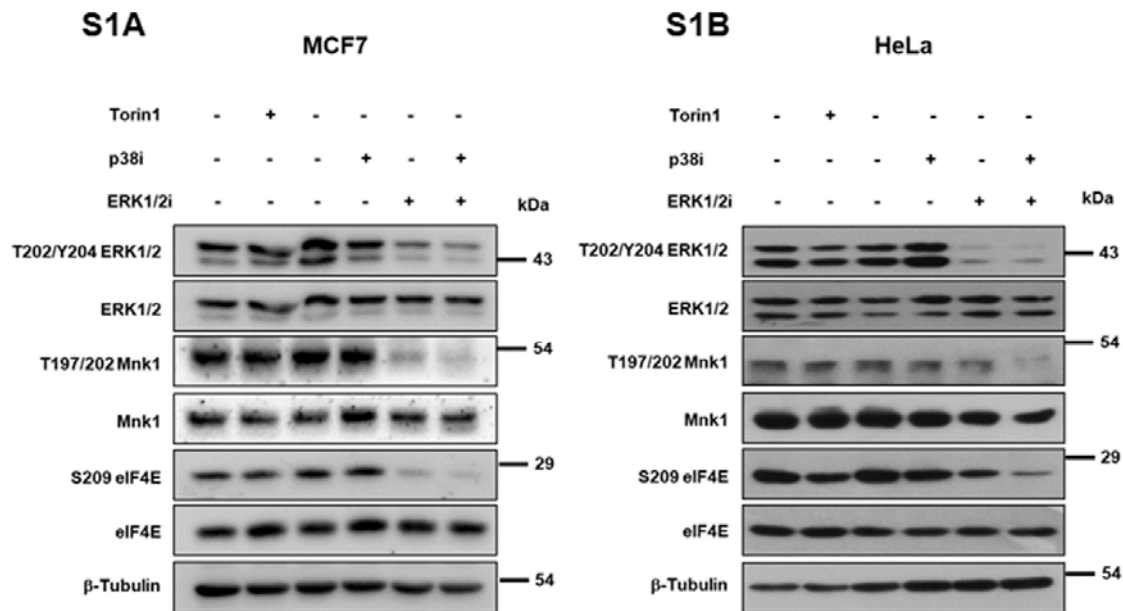

862

863 **Supplementary Figure S1. p38 and ERK1/2 MAPK synergistically regulates**

864 **eIF4E phosphorylation across multiple cell lines. (S1A)** Immunoblots depicting

865 phosphorylation and expression status of ERK1/2, Mnk1 and eIF4E from MCF7 cells

866 treated with DMSO vehicle control, Torin1 (750 nM), p38i (50 μM), ERK1/2i (100 μM)

867 or Dual-Mi (50/100 μM p38i/ERK1/2i). **(S1B)** Immunoblots depicting phosphorylation

868 and expression status of ERK1/2, Mnk1, and eIF4E from HeLa cells treated as

869 mentioned in (S1A).

870

871

872

873

874 Figure S2

875

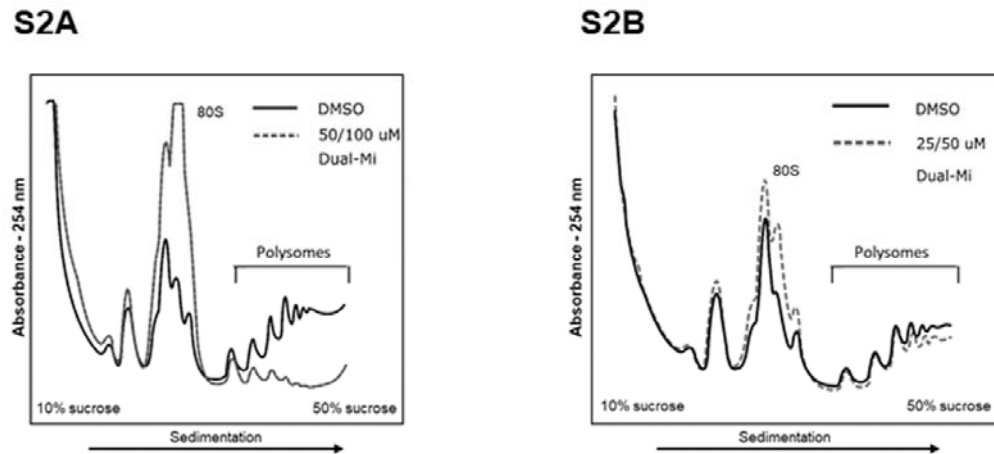

876

877

878 **Supplementary Figure S2. p38 and ERK1/2 dual inhibition causes polysomal**

879 **collapse in MCF7 cells. (S2A)** MCF7 cells were subjected to dual-Mi (50/100 μM

880 p38i/ERK1/2i) or to DMSO treatment for 1- hour and polysome profiling was

881 performed. (S2B) Polysome profile of the cells subjected to similar treatment but at

882 lower concentrations of the inhibitors (25/50 μM p38i/ERK1/2i). Free ribosomal

883 subunits (40S and 60S), monosome (80S) and the polysomes were fractionated by

884 measuring the absorbance at 254 nm. Each graph shows treatment-curve overlaid

885 on the vehicle control.

886

887

888

889

890 Figure S3

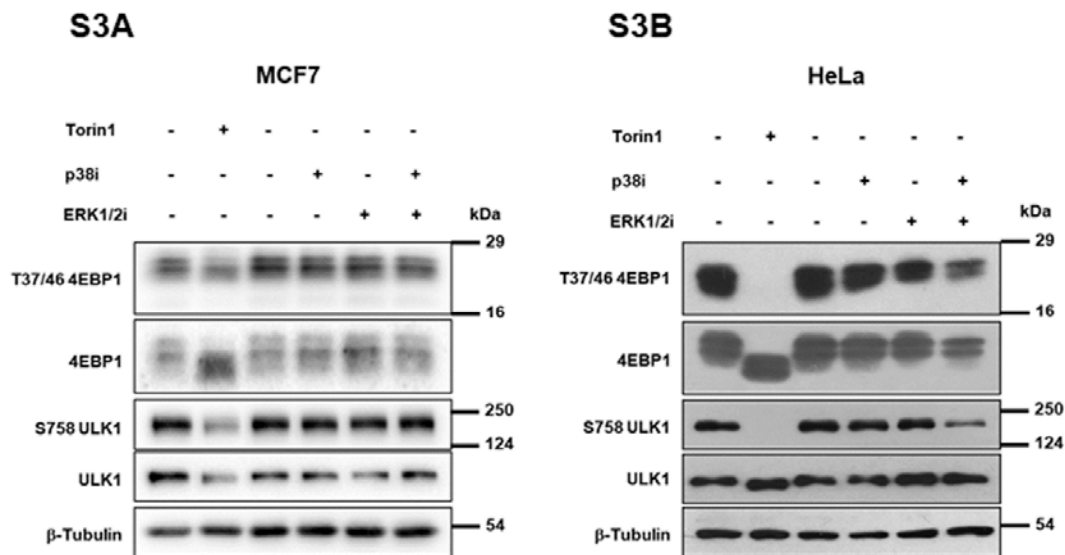

891

892

893 **Supplementary Figure S3. Regulation of mTORC1 pathway by p38 and ERK1/2**

894 **MAPKs is contextual. (S3A)** Immunoblots depicting phosphorylation and

895 expression status of 4EBP1 and ULK1 from MCF7 cells treated with DMSO vehicle

896 control, Torin1 (750 nM), p38i (50  $\mu$ M), ERK1/2i (100  $\mu$ M) or Dual-Mi (50/100  $\mu$ M

897 p38i/ERK1/2i) for 1- hour. **(S3B)** Immunoblots demonstrating phosphorylation and

898 expression status of 4EBP1 and ULK1 from HeLa cells treated with DMSO vehicle

899 control, Torin1 (750 nM), p38i (50  $\mu$ M), ERK1/2i (100  $\mu$ M) or Dual-Mi (50/100  $\mu$ M

900 p38i/ERK1/2i) for 1- hour.

901

902

903

904



905 Figure S4

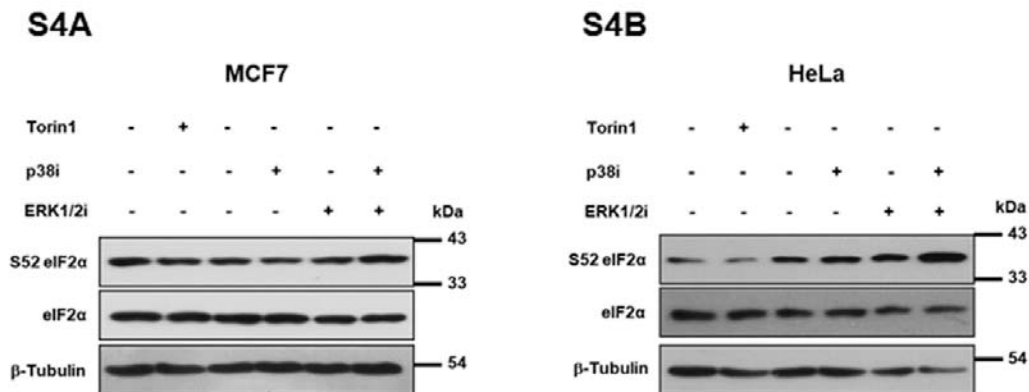

906

907

908 **Supplementary Figure S4. p38 and ERK1/2 dual-MAPK inhibition activates ISR**

909 **signalling. (S4A)** Immunoblots depicting phosphorylation and expression status of

910 eIF2α from MCF7 cells treated with DMSO vehicle control, Torin1 (750 nM), p38i (50

911 μM), ERK1/2i (50 μM) or Dual-Mi (50/50 μM p38i/ERK1/2i) for 1- hour. **(S4B)**

912 Immunoblots depicting phosphorylation status of eIF2α from HeLa cells treated with

913 DMSO vehicle control, Torin1 (750 nM), p38i (50 μM), ERK1/2i (100 μM) or Dual-Mi

914 (50/100 μM p38i/ERK1/2i) for 1- hour.

915

916

917

918

919

920

921

922 Figure S5

923

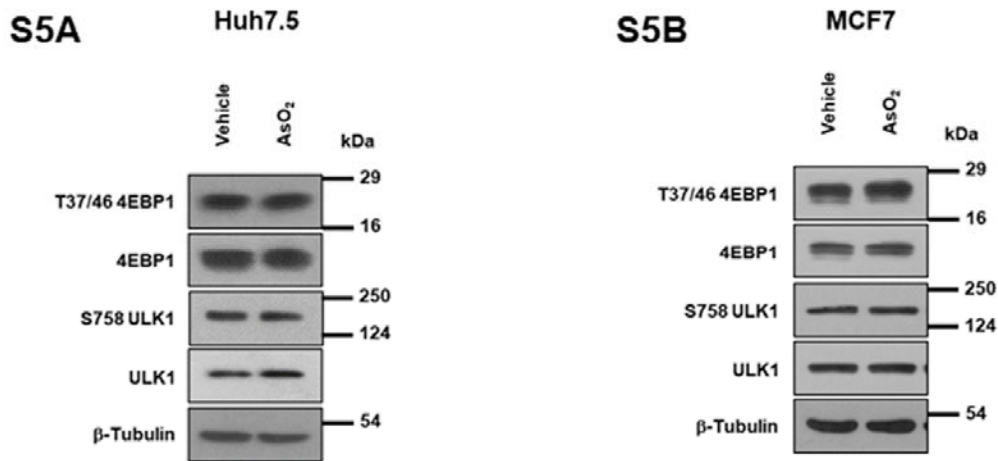

924

925

926 **Supplementary Figure S5 mTORC1 pathway was unaffected during sodium**

927 **arsenite induced ISR. (S5A)** Immunoblots depicting phosphorylation and

928 expression status of 4EBP1 and ULK1 from vehicle or sodium arsenite (40 μM)

929 treated Huh7.5 cells for 1- hour. **(S5B)** Immunoblots depicting phosphorylation and

930 expression status of 4EBP1 and ULK1 from vehicle or sodium arsenite (40 μM)

931 treated MCF7 cells for 1- hour.

932

933
